# Supplementary material
Source: PubMed Central journal article supplement (PMC152852)
Supplement: nar_31_6_1656__1.pdf [file nar_31_6_1656__1.pdf]

**Supplemental Table 1.** *E. coli* chromosomal integration sites obtained using a RAM-targetron library with randomized target site recognition sequences.

| Target gene | Target gene function                                                  | Integration site   | Annotation          |
|-------------|-----------------------------------------------------------------------|--------------------|---------------------|
|             | intergenic region                                                     | 3553453o           |                     |
|             | intergenic region                                                     | 3643872o           |                     |
|             | intergenic region                                                     | 3773856o           |                     |
|             | intergenic region                                                     | 3851225i           |                     |
|             | intergenic repeats                                                    | 2902301o           |                     |
| agaZ        | putative tagatose 6-phosphate kinase 2                                | 3276627o           |                     |
| argE        | acetylornithine deacetylase                                           | 4151651i           |                     |
| b1452       | putative receptor                                                     | 1521597i           |                     |
| b2520       | unknown                                                               | 2647574i           |                     |
| b3814       | unknown                                                               | 3998023o           |                     |
| bisC        | biotin sulfoxide reductase                                            | 3711727o           |                     |
| cdh         | CDP-diacylglycerol phosphotidylhydrolase                              | 4107960i           |                     |
| cyaA        | adenylate cyclase                                                     | 3988770o           |                     |
| deaD        | ATP-independent RNA helicase                                          | 3304206o           |                     |
| deoB        | phosphopentomutase                                                    | 4617331o           |                     |
| ebgA        | evolved beta-D-galactosidase, alpha subunit                           | 3220453o, 3221497i |                     |
| eutH        | putative transport protein                                            | 2565489i           |                     |
| fadB        | 4-enzyme protein                                                      | 4027811i           |                     |
| flhA        | flagellar structural component                                        | 1962889i           |                     |
| fliC        | flagellin                                                             | 2000818i           |                     |
| fpr         | ferredoxin-NADP reductase                                             | 4111553o           | 2 different introns |
| frvB        | transport of small molecules (carbohydrates, organic acids, alcohols) | 4089543i           |                     |
| FrwD        | PTS system fructose-like IIB component 2                              | 4144880i           |                     |
| glnL        | histidine protein kinase sensor for GlnG regulator                    | 4052894i           |                     |
| gltS        | transport of small molecules (amino acids & amines)                   | 3826182o           |                     |
| hofQ        | putative transport protein                                            | 3517567i           |                     |
| hsdR        | endonuclease R                                                        | 4582348o           |                     |
| hybF        | may modulate levels of hydrogenase-2                                  | 3138104o           |                     |
| ilvB        | acetolactase synthase I                                               | 3849472i           |                     |
| ilvD        | dihydroxyacid dehydratase                                             | 3952908i           |                     |
| ilvG_2      | acetolactate synthase II                                              | 3949387o           |                     |
| ilvY        | positive regulator for ilvC                                           | 3955169i           |                     |
| katG        | catalase                                                              | 4132746i           |                     |
| malM        | periplasmic protein of mal regulon                                    | 4247678i           |                     |
| malT        | positive regulator of mal regulon                                     | 3552527i           |                     |
| metL        | aspartokinase II and homoserine dehydrogenase II                      | 4129267i           |                     |
| modF        | ATP-binding component of molybdate transport system                   | 792101o            |                     |
| nfnB        | oxygen-insensitive NAD(P)H nitroreductase                             | 604329i            |                     |
| nrdE        | ribonucleoside-diphosphate reductase 2, alpha subunit                 | 2801360o           |                     |
| nrfA        | periplasmic cytochrome C                                              | 4286662i           |                     |
| ppiA        | peptidyl-prolyl cis-trans isomerase (rotamase A)                      | 3489568o           |                     |
| ppx         | exopolyphosphatase                                                    | 2624459o           |                     |
| ptsI        | pEP-protein phosphotransferase system enzyme I                        | 2533081o           |                     |
| recQ        | ATP-dependent DNA helicase                                            | 4003683o           |                     |
| rhaB        | rhamnulokinase                                                        | 4094828o           |                     |
| rhsA        | rhsA protein in rhs element; Transposon-related functions             | 3759887o           |                     |
| sela        | selenocysteine synthase                                               | 3758861o, 3757911i |                     |

|      |                                                                       |                    |                     |
|------|-----------------------------------------------------------------------|--------------------|---------------------|
| selB | selenocysteinyl-tRNA-specific translation factor                      | 3756822i           |                     |
| ubiB | ferrisiderophore reductase/flavin reductase                           | 4024371o           |                     |
| ugpB | sn-glycerol 3-phosphate transport system; periplasmic binding protein | 3589389o           |                     |
| uhpB | sensor histidine protein kinase                                       | 3847413i           |                     |
| wecE | putative regulator                                                    | 3973830o, 3973099o |                     |
| wzxE | putative cytochrome                                                   | 3974108i           |                     |
| yfbS | putative transport protein                                            | 2408241i           |                     |
| yfeN | putative sugar hydrolase                                              | 2523510o           |                     |
| yggM | unknown                                                               | 3096577o, 3097264o |                     |
| ygjE | unknown                                                               | 3206400i           |                     |
| ygjO | putative enzyme                                                       | 3232638i           |                     |
| yhcD | putative outer membrane protein                                       | 3362694o           |                     |
| yhcP | unknown                                                               | 3384118o           |                     |
| yhiQ | unknown                                                               | 3640733o           | 5 different introns |
| yhjK | unknown                                                               | 3681887i           |                     |
| yhjS | putative protease                                                     | 3694887o           |                     |
| yhjW | unknown                                                               | 3706205i           |                     |
| yiaM | unknown                                                               | 3742411i           |                     |
| yiaY | putative oxidoreductase                                               | 3754545o           |                     |
| yibK | unknown                                                               | 3778886i           |                     |
| yicO | unknown                                                               | 3840463o, 3840519i |                     |
| yidJ | unknown, similar to arylsulfatases                                    | 3854924o           | 2 identical introns |
| yidR | unknown                                                               | 3866768i           |                     |
| yidZ | putative transcriptional regulator LYSR-type                          | 3890889o, 3890949i |                     |
| yieG | putative membrane / transport protein                                 | 3893761i, 3893459i |                     |
| yieK | putative isomerase                                                    | 3896317i           |                     |
| yieL | putative xylanase                                                     | 3897502o           |                     |
| yigB | putative phosphatase                                                  | 3994809o           |                     |
| yigZ | unknown                                                               | 4030395o           |                     |
| yihO | putative permease                                                     | 4063262o           |                     |
| yihU | putative dehydorgenase                                                | 4070425i           |                     |
| yjbC | unknown                                                               | 4228328i           |                     |
| yjgR | unknown                                                               | 4487174i           |                     |
| yqjB | unknown                                                               | 3246378o           |                     |
| yraR | unknown                                                               | 3296369o           |                     |
| ysgA | unknown                                                               | 4013570i           |                     |

Integration sites are numbered according to the genome sequence of *E. coli* K-12 MG1655 (Genbank accession number U00096), followed by o or i, indicating the outside (presented) or inside DNA strand.
